# Supplementary material for: Autophagy in antigen-presenting cells results in presentation of citrullinated peptides to CD4 T cells
Source: Oxford University Press journal article supplement (doi:10.1084/jem.20110640), 2011-12-12
Supplement: jem_20110640_sm.pdf [file jem_20110640_sm.pdf]

SUPPLEMENTAL MATERIAL

Ireland and Unanue, <http://www.jem.org/cgi/content/full/jem.20110640/DC1>

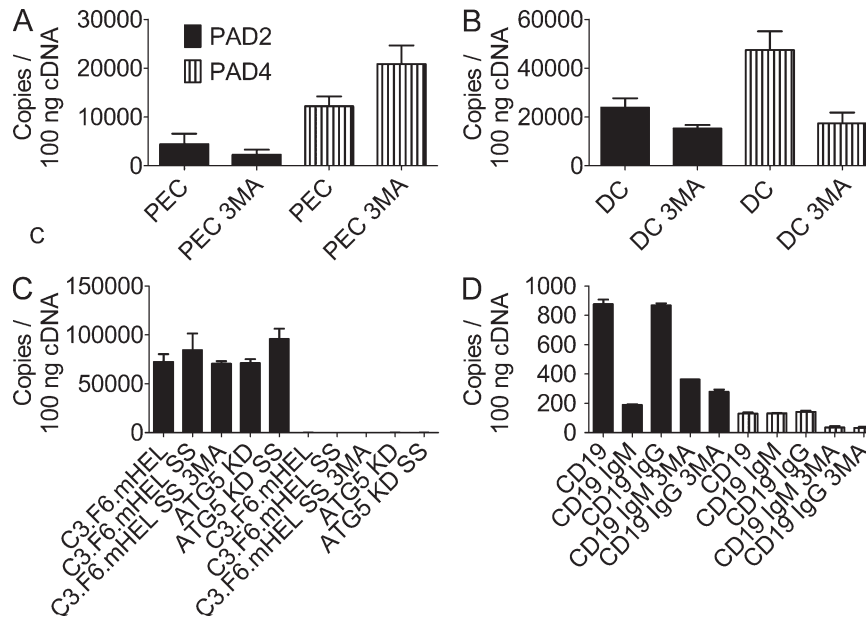

**Figure S1. Presentation of citrullinated peptides is not associated with a change in expression of PAD enzymes.** (A–D) Quantitative RT-PCR was performed on cDNA generated from PECs (A), DCs (B), C3.F6.mHEL or C3.F6.mHEL cells in which Atg5 expression had been knocked down (labeled as ATG5 KD; C), or CD19 collected from B10.BR spleen (D). 3MA or SS indicates that cells were treated with the drug or cultured in 1% FCS for 6 h. Data are presented as the mean of quadruplicate reaction replicates and are representative of at least two independent experiments. Error bars indicate SEM.

**Table S1. Biochemical detection of citrulline in naturally processed peptides indicates higher levels after culture in serum-starved conditions**

| Experiment | Culture  | Citrulline/10 <sup>9</sup> cells | Fold increase |
|------------|----------|----------------------------------|---------------|
|            |          | <i>nmol</i>                      |               |
| 1          | 1% serum | 5.05                             | 2.46          |
|            | 5% serum | 2.06                             |               |
| 2          | 1% serum | 2.62                             | 8.73          |
|            | 5% serum | 0.30                             |               |
| 3          | 1% serum | 18.19                            | 13.50         |
|            | 5% serum | 1.35                             |               |
| 4          | 1% serum | 2.37                             | 2.25          |
|            | 5% serum | 1.05                             |               |
